# Supplementary material
Source: publisher figshare collection journal article supplement (https://acs.figshare.com/ndownloader/files/16253561)
Supplement: Supplementary file 1 [file 16253561]

## Supporting Information

# Similarities and Critical Differences in Heavy Alkali-Metal Rubidium and Cesium Effects on Chalcopyrite Cu(In,Ga)Se<sub>2</sub> Thin-Film Solar Cells

*Shogo Ishizuka<sup>1\*</sup>, Noboru Taguchi<sup>2</sup>, and Paul J. Fons<sup>3</sup>*

<sup>1</sup>Research Center for Photovoltaics, National Institute of Advanced Industrial Science and Technology (AIST), 1-1-1 Umezono, Tsukuba, Ibaraki 305-8568, Japan

<sup>2</sup>Research Institute of Electrochemical Energy, National Institute of Advanced Industrial Science and Technology (AIST), 1-8-31 Midorigaoka, Ikeda, Osaka 563-8577, Japan

<sup>3</sup>Nanoelectronics Research Institute, National Institute of Advanced Industrial Science and Technology (AIST), 1-1-1 Higashi, Tsukuba, Ibaraki 305-8565, Japan

*\*E-mail: shogo-ishizuka@aist.go.jp*

## Supplementary Figures

### a w/o PDT

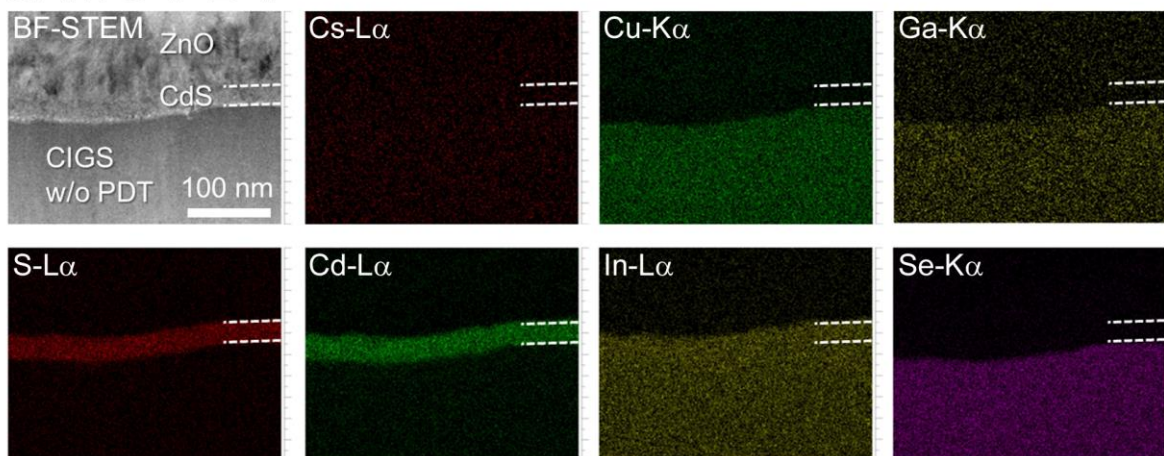

### b CsF-PDT

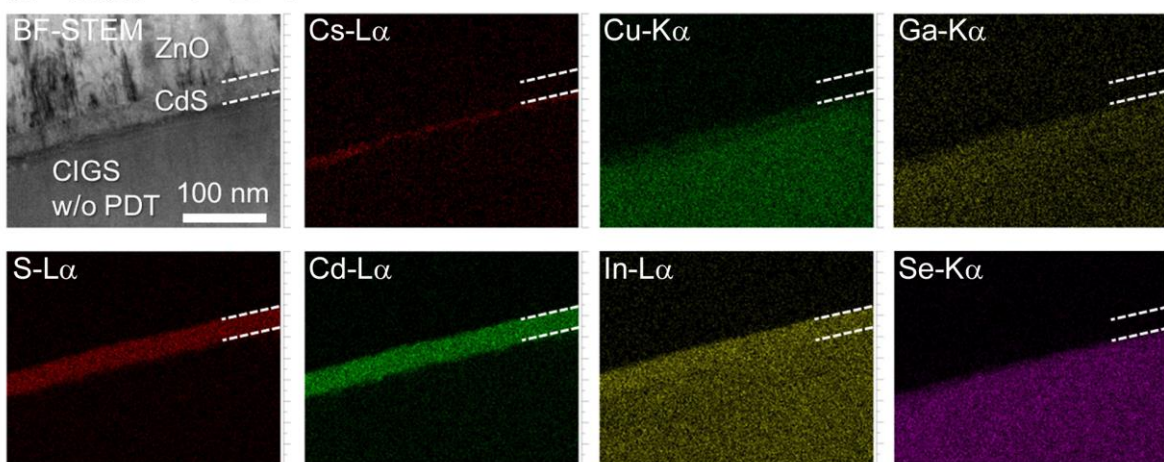

**Figure S1.** Cross sectional TEM-EDX measurement results obtained from CIGS devices fabricated (a) w/o PDT and (b) with CsF-PDT corresponding to the images shown in Figure 1 in the main text. Note that the elemental In signal observed in the CdS layer is an artifact due to the energy overlap with Cd-L $\beta$  at 3.3 keV.

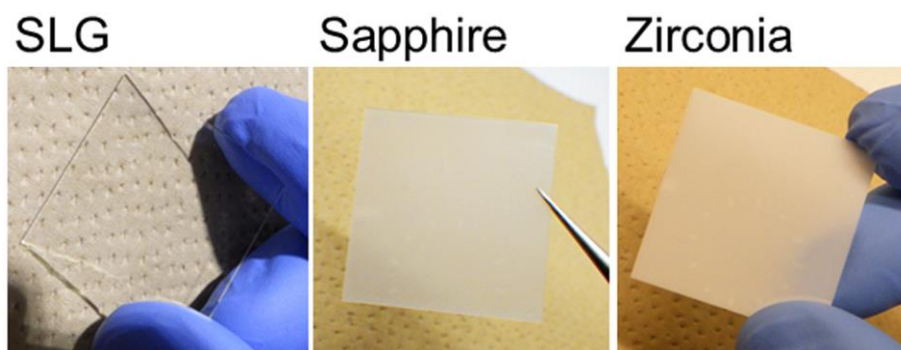

**Figure S2.** Photos of substrate materials ( $3 \times 3 \text{ cm}^2$ ) used in the present work.
